# Supplementary material for: A high level theory investigation on the lowest-lying ionization potentials of glycine (NH2CH2COOH)
Source: Royal Society of Chemistry journal article supplement (doi:10.1039/d2cp02397k), 2022-01-01
Supplement: d2cp02397k1.pdf [file d2cp02397k1.pdf]

# Journal Name

## ARTICLE TYPE

Cite this: DOI: 00.0000/xxxxxxxxxx

### **Supplementary Material: A high level theory investigation on the lowest-lying ionization potentials of glycine (C<sub>2</sub>H<sub>5</sub>NO<sub>2</sub>)**

Gabriel L. C. de Souza<sup>\*a,b</sup> and Kirk A. Peterson<sup>\*b</sup>

<sup>a</sup> Departamento de Química, Universidade Federal de Mato Grosso, Cuiabá, Mato Grosso, 78060-900 Brazil; E-mail: gabrielcs@pq.cnpq.br

<sup>b</sup> Department of Chemistry, Washington State University, Pullman, Washington, 99164 USA. E-mail: kipeters@wsu.edu

**Table S1** Vertical ionization potentials (IPs) for NH<sub>2</sub>CH<sub>2</sub>COOH as determined using the frozen-core EOMIP-CCSD/AVXZ (X = D, T, and Q) approach.<sup>a</sup> All values are given in eV.

| AVDZ |       |       |       |       |       |       |
|------|-------|-------|-------|-------|-------|-------|
| IP   | Ip    | IIIn  | IIP   | IIIIn | IIIP  | IVn   |
| 1    | 9.92  | 9.99  | 9.93  | 9.63  | 9.63  | 9.78  |
| 2    | 10.90 | 11.32 | 11.37 | 11.42 | 11.44 | 10.80 |
| 3    | 12.09 | 11.41 | 11.40 | 12.02 | 11.95 | 12.04 |
| 4    | 13.57 | 13.44 | 13.42 | 13.70 | 13.71 | 13.92 |
| 5    | 14.41 | 13.90 | 13.84 | 14.39 | 14.34 | 14.35 |
| 6    | 15.05 | 15.07 | 15.06 | 14.71 | 14.79 | 14.96 |
| 7    | 15.69 | 15.66 | 15.64 | 15.82 | 15.68 | 15.58 |
| 8    | 16.94 | 16.72 | 16.73 | 16.94 | 16.99 | 16.81 |
| 9    | 17.19 | 17.71 | 17.87 | 16.99 | 17.02 | 17.04 |
| 10   | 17.69 | 18.44 | 18.37 | 17.75 | 17.74 | 17.95 |
| 11   | 20.36 | 19.86 | 19.83 | 20.73 | 20.76 | 20.27 |
| 12   | 22.05 | 22.33 | 22.32 | 21.44 | 21.66 | 21.90 |
| AVTZ |       |       |       |       |       |       |
| IP   | Ip    | IIIn  | IIP   | IIIIn | IIIP  | IVn   |
| 1    | 10.13 | 10.22 | 10.16 | 9.85  | 9.85  | 9.99  |
| 2    | 11.12 | 11.52 | 11.58 | 11.64 | 11.66 | 11.02 |
| 3    | 12.29 | 11.62 | 11.61 | 12.23 | 12.15 | 12.25 |
| 4    | 13.72 | 13.62 | 13.61 | 13.86 | 13.88 | 14.08 |
| 5    | 14.57 | 14.07 | 14.00 | 14.55 | 14.51 | 14.51 |
| 6    | 15.20 | 15.22 | 15.21 | 14.86 | 14.94 | 15.11 |
| 7    | 15.85 | 15.80 | 15.79 | 15.97 | 15.83 | 15.72 |
| 8    | 17.09 | 16.86 | 16.87 | 17.09 | 17.14 | 16.95 |
| 9    | 17.34 | 17.86 | 18.02 | 17.14 | 17.17 | 17.19 |
| 10   | 17.81 | 18.57 | 18.49 | 17.87 | 17.86 | 18.07 |
| 11   | 20.47 | 19.98 | 19.95 | 20.84 | 20.87 | 20.38 |
| 12   | 22.60 | 22.88 | 22.87 | 21.99 | 22.21 | 22.41 |
| AVQZ |       |       |       |       |       |       |
| IP   | Ip    | IIIn  | IIP   | IIIIn | IIIP  | IVn   |
| 1    | 10.20 | —     | —     | —     | —     | —     |
| 2    | 11.21 | —     | —     | —     | —     | —     |
| 3    | 12.38 | —     | —     | —     | —     | —     |
| 4    | 13.78 | —     | —     | —     | —     | —     |
| 5    | 14.65 | —     | —     | —     | —     | —     |
| 6    | 15.27 | —     | —     | —     | —     | —     |
| 7    | 15.91 | —     | —     | —     | —     | —     |
| 8    | 17.17 | —     | —     | —     | —     | —     |
| 9    | 17.41 | —     | —     | —     | —     | —     |
| 10   | 17.86 | —     | —     | —     | —     | —     |
| 11   | 20.54 | —     | —     | —     | —     | —     |
| 12   | 22.75 | —     | —     | —     | —     | —     |

<sup>a</sup> The CCSD(T)/AVTZ value for the first vertical IP of the Ip conformer (MP2 geometry of neutral) is 10.11 eV with the first adiabatic IP [CCSD(T)/AVTZ optimized geometry and harmonic zero-point corrections) at 9.34 eV

**Table S2** CBS extrapolation using Eq.1 at the [DT], [TQ], and [DTQ] levels for the vertical IPs. Again, all values given in eV.

| CBS[DT]  |       |       |       |       |       |       |
|----------|-------|-------|-------|-------|-------|-------|
| IP       | Ip    | IIIn  | IIP   | IIIIn | IIIP  | IVn   |
| 1        | 10.20 | 10.30 | 10.24 | 9.93  | 9.93  | 10.06 |
| 2        | 11.20 | 11.59 | 11.65 | 11.72 | 11.73 | 11.10 |
| 3        | 12.37 | 11.69 | 11.68 | 12.30 | 12.22 | 12.32 |
| 4        | 13.77 | 13.69 | 13.67 | 13.91 | 13.93 | 14.13 |
| 5        | 14.63 | 14.13 | 14.06 | 14.61 | 14.57 | 14.57 |
| 6        | 15.25 | 15.28 | 15.26 | 14.92 | 14.99 | 15.17 |
| 7        | 15.90 | 15.85 | 15.84 | 16.02 | 15.88 | 15.77 |
| 8        | 17.15 | 16.91 | 16.92 | 17.14 | 17.19 | 17.00 |
| 9        | 17.39 | 17.91 | 18.08 | 17.20 | 17.22 | 17.24 |
| 10       | 17.85 | 18.62 | 18.53 | 17.92 | 17.90 | 18.12 |
| 11       | 20.51 | 20.02 | 19.99 | 20.88 | 20.90 | 20.42 |
| 12       | 22.79 | 23.07 | 23.06 | 22.19 | 22.41 | 22.60 |
| CBS[TQ]  |       |       |       |       |       |       |
| IP       | Ip    | IIIn  | IIP   | IIIIn | IIIP  | IVn   |
| 1        | 10.23 | —     | —     | —     | —     | —     |
| 2        | 11.26 | —     | —     | —     | —     | —     |
| 3        | 12.43 | —     | —     | —     | —     | —     |
| 4        | 13.81 | —     | —     | —     | —     | —     |
| 5        | 14.69 | —     | —     | —     | —     | —     |
| 6        | 15.30 | —     | —     | —     | —     | —     |
| 7        | 15.95 | —     | —     | —     | —     | —     |
| 8        | 17.21 | —     | —     | —     | —     | —     |
| 9        | 17.45 | —     | —     | —     | —     | —     |
| 10       | 17.89 | —     | —     | —     | —     | —     |
| 11       | 20.57 | —     | —     | —     | —     | —     |
| 12       | 22.83 | —     | —     | —     | —     | —     |
| CBS[DTQ] |       |       |       |       |       |       |
| IP       | Ip    | IIIn  | IIP   | IIIIn | IIIP  | IVn   |
| 1        | 10.24 | —     | —     | —     | —     | —     |
| 2        | 11.26 | —     | —     | —     | —     | —     |
| 3        | 12.44 | —     | —     | —     | —     | —     |
| 4        | 13.81 | —     | —     | —     | —     | —     |
| 5        | 14.71 | —     | —     | —     | —     | —     |
| 6        | 15.31 | —     | —     | —     | —     | —     |
| 7        | 15.97 | —     | —     | —     | —     | —     |
| 8        | 17.25 | —     | —     | —     | —     | —     |
| 9        | 17.47 | —     | —     | —     | —     | —     |
| 10       | 17.90 | —     | —     | —     | —     | —     |
| 11       | 20.63 | —     | —     | —     | —     | —     |
| 12       | 22.80 | —     | —     | —     | —     | —     |

**Table S3** Vertical ionization potentials (IPs) and  $\Delta_{CV}$  for  $\text{NH}_2\text{CH}_2\text{COOH}$  as determined using the frozen-core EOMIP-CCSD/ACVXZ (X = D and T) approach. All values are given in eV.

| ACVDZ              |                |                 |                 |                  |                  |                 |
|--------------------|----------------|-----------------|-----------------|------------------|------------------|-----------------|
| IP                 | I <sub>p</sub> | II <sub>n</sub> | II <sub>p</sub> | III <sub>n</sub> | III <sub>p</sub> | IV <sub>n</sub> |
| 1                  | 9.93           | 10.01           | 9.95            | 9.64             | 9.64             | 9.79            |
| 2                  | 10.91          | 11.33           | 11.38           | 11.43            | 11.45            | 10.81           |
| 3                  | 12.10          | 11.42           | 11.42           | 12.03            | 11.95            | 12.05           |
| 4                  | 13.57          | 13.45           | 13.44           | 13.71            | 13.70            | 13.92           |
| 5                  | 14.42          | 13.90           | 13.85           | 14.40            | 14.35            | 14.35           |
| 6                  | 15.06          | 15.08           | 15.10           | 14.72            | 14.80            | 14.96           |
| 7                  | 15.70          | 15.66           | 15.65           | 15.82            | 15.68            | 15.59           |
| 8                  | 16.95          | 16.73           | 16.75           | 16.95            | 17.00            | 16.82           |
| 9                  | 17.21          | 17.72           | 17.88           | 17.00            | 17.03            | 17.06           |
| 10                 | 17.69          | 18.45           | 18.38           | 17.76            | 17.74            | 17.95           |
| 11                 | 20.37          | 19.87           | 19.85           | 20.74            | 20.77            | 20.28           |
| 12                 | 22.07          | 22.35           | 22.41           | 21.46            | 21.68            | 21.92           |
| ACVTZ              |                |                 |                 |                  |                  |                 |
| IP                 | I <sub>p</sub> | II <sub>n</sub> | II <sub>p</sub> | III <sub>n</sub> | III <sub>p</sub> | IV <sub>n</sub> |
| 1                  | 10.14          | 10.23           | 10.20           | 9.86             | 9.86             | 9.99            |
| 2                  | 11.13          | 11.53           | 11.61           | 11.65            | 11.67            | 11.03           |
| 3                  | 12.30          | 11.63           | 11.64           | 12.24            | 12.16            | 12.26           |
| 4                  | 13.72          | 13.63           | 13.64           | 13.86            | 13.88            | 14.08           |
| 5                  | 14.58          | 14.07           | 14.03           | 14.56            | 14.52            | 14.52           |
| 6                  | 15.21          | 15.23           | 15.25           | 14.87            | 14.94            | 15.12           |
| 7                  | 15.85          | 15.81           | 15.82           | 15.98            | 15.84            | 15.73           |
| 8                  | 17.10          | 16.87           | 16.90           | 17.10            | 17.15            | 16.96           |
| 9                  | 17.35          | 17.87           | 18.05           | 17.15            | 17.17            | 17.20           |
| 10                 | 17.81          | 18.57           | 18.51           | 17.88            | 17.86            | 18.08           |
| 11                 | 20.48          | 19.99           | 19.98           | 20.85            | 20.87            | 20.39           |
| 12                 | 22.62          | 22.90           | 23.01           | 22.02            | 22.23            | 22.43           |
| $\Delta_{CV}$ (DZ) |                |                 |                 |                  |                  |                 |
| IP                 | I <sub>p</sub> | II <sub>n</sub> | II <sub>p</sub> | III <sub>n</sub> | III <sub>p</sub> | IV <sub>n</sub> |
| 1                  | 0.006          | 0.007           | 0.007           | 0.007            | 0.007            | 0.006           |
| 2                  | 0.008          | 0.007           | 0.007           | 0.007            | 0.007            | 0.007           |
| 3                  | 0.007          | 0.007           | 0.007           | 0.007            | 0.007            | 0.007           |
| 4                  | 0.005          | 0.007           | 0.007           | 0.005            | 0.005            | 0.006           |
| 5                  | 0.007          | 0.006           | 0.006           | 0.006            | 0.007            | 0.006           |
| 6                  | 0.006          | 0.007           | 0.007           | 0.006            | 0.006            | 0.007           |
| 7                  | 0.007          | 0.007           | 0.007           | 0.007            | 0.008            | 0.006           |
| 8                  | 0.007          | 0.006           | 0.006           | 0.005            | 0.008            | 0.007           |
| 9                  | 0.006          | 0.005           | 0.005           | 0.008            | 0.03             | 0.005           |
| 10                 | 0.005          | 0.005           | 0.005           | 0.005            | 0.005            | 0.005           |
| 11                 | 0.004          | 0.005           | 0.005           | 0.004            | 0.004            | 0.004           |
| 12                 | 0.06           | 0.06            | 0.06            | 0.06             | 0.24             | 0.005           |
| $\Delta_{CV}$ (TZ) |                |                 |                 |                  |                  |                 |
| IP                 | I <sub>p</sub> | II <sub>n</sub> | II <sub>p</sub> | III <sub>n</sub> | III <sub>p</sub> | IV <sub>n</sub> |
| 1                  | 0.02           | 0.03            | 0.03            | 0.03             | 0.03             | 0.02            |
| 2                  | 0.03           | 0.02            | 0.03            | 0.03             | 0.03             | 0.03            |
| 3                  | 0.03           | 0.03            | 0.03            | 0.03             | 0.03             | 0.03            |
| 4                  | 0.02           | 0.03            | 0.03            | 0.02             | 0.02             | 0.03            |
| 5                  | 0.03           | 0.02            | 0.02            | 0.02             | 0.03             | 0.02            |
| 6                  | 0.02           | 0.03            | 0.03            | 0.02             | 0.02             | 0.02            |
| 7                  | 0.02           | 0.02            | 0.02            | 0.02             | 0.02             | 0.02            |
| 8                  | 0.02           | 0.02            | 0.02            | 0.02             | 0.03             | 0.02            |
| 9                  | 0.02           | 0.02            | 0.02            | 0.03             | 0.05             | 0.02            |
| 10                 | 0.02           | 0.02            | 0.02            | 0.01             | 0.02             | 0.02            |
| 11                 | 0.01           | 0.02            | 0.02            | 0.02             | 0.02             | 0.01            |
| 12                 | 0.12           | 0.12            | 0.12            | 0.12             | 0.12             | 0.11            |

**Table S4** Raw values used for computing the vertical ionization potentials (IPs) for the I<sub>p</sub> conformation of the  $\text{C}_2\text{H}_5\text{NO}_2$  molecule determined using the frozen-core EOMIP-CCSD/AVXZ (X = D, T, and Q) approach. The values are given in hartrees.

| AVDZ         |                     |
|--------------|---------------------|
| Ground state | -283.76458648730500 |
| 1IP          | -283.40013538407982 |
| 2IP          | -283.36417474944994 |
| 3IP          | -283.32039406358166 |
| 4IP          | -283.26603449284943 |
| 5IP          | -283.23520933298903 |
| 6IP          | -283.21135355705047 |
| 7IP          | -283.18799921118506 |
| 8IP          | -283.14200148967439 |
| 9IP          | -283.13291171149785 |
| 10IP         | -283.11466159615844 |
| 11IP         | -283.01645562176350 |
| 12IP         | -282.95441025588900 |
| AVTZ         |                     |
| Ground state | -283.99780932359988 |
| 1IP          | -283.62560706077602 |
| 2IP          | -283.58914629123126 |
| 3IP          | -283.54605345003671 |
| 4IP          | -283.49360357220354 |
| 5IP          | -283.46237688616293 |
| 6IP          | -283.43915680738627 |
| 7IP          | -283.41551625164846 |
| 8IP          | -283.36969703769631 |
| 9IP          | -283.36056401092964 |
| 10IP         | -283.34345460106050 |
| 11IP         | -283.24553625919037 |
| 12IP         | -283.16742970371342 |
| AVQZ         |                     |
| Ground state | -284.06844263002432 |
| 1IP          | -283.69374951379910 |
| 2IP          | -283.65662864020305 |
| 3IP          | -283.61360058139093 |
| 4IP          | -283.56221983560857 |
| 5IP          | -283.53018871891794 |
| 6IP          | -283.50747595854847 |
| 7IP          | -283.48365289391973 |
| 8IP          | -283.43748116355255 |
| 9IP          | -283.42858431329444 |
| 10IP         | -283.41216707627234 |
| 11IP         | -283.31376359182212 |
| 12IP         | -283.23255310659516 |

**Table S5** Raw values used for computing the vertical ionization potentials (IPs) for the Ip conformation of the C<sub>2</sub>H<sub>5</sub>NO<sub>2</sub> molecule determined using the EOMIP-CCSD/ACVXZ (X = D, T, and Q) approach. The values are given in hartrees.

| ACVDZ        |                     |
|--------------|---------------------|
| Ground state | -283.96557220655882 |
| 1IP          | -283.60046211949475 |
| 2IP          | -283.56449224880998 |
| 3IP          | -283.52078946655649 |
| 4IP          | -283.46663346785959 |
| 5IP          | -283.43552478769124 |
| 6IP          | -283.41180386669822 |
| 7IP          | -283.38847343068130 |
| 8IP          | -283.34228853704997 |
| 9IP          | -283.33308700599918 |
| 10IP         | -283.31523838302417 |
| 11IP         | -283.21687543289863 |
| 12IP         | -283.15217791314114 |

  

| ACVTZ        |                     |
|--------------|---------------------|
| Ground state | -284.26525818019900 |
| 1IP          | -283.89184118147045 |
| 2IP          | -283.85506597350451 |
| 3IP          | -283.81203466575687 |
| 4IP          | -283.76024725874186 |
| 5IP          | -283.72842177772691 |
| 6IP          | -283.70559920258302 |
| 7IP          | -283.68181300399260 |
| 8IP          | -283.63586559422816 |
| 9IP          | -283.62685862792199 |
| 10IP         | -283.61019076434042 |
| 11IP         | -283.51218499044762 |
| 12IP         | -283.42960516768773 |

**Table S6** Raw values used for computing the vertical ionization potentials (IPs) for the Ip conformation of the C<sub>2</sub>H<sub>5</sub>NO<sub>2</sub> molecule determined using the frozen-core EOMIP-CCSD/ACVXZ (X = D, T, and Q) approach. The values are given in hartrees.

| ACVDZ        |                     |
|--------------|---------------------|
| Ground state | -283.77590849919676 |
| 1IP          | -283.41103039269268 |
| 2IP          | -283.37511035299008 |
| 3IP          | -283.33139550800649 |
| 4IP          | -283.27714959765126 |
| 5IP          | -283.24611376857860 |
| 6IP          | -283.22235111485469 |
| 7IP          | -283.19908395282590 |
| 8IP          | -283.15288792592253 |
| 9IP          | -283.14362775479350 |
| 10IP         | -283.12576594073295 |
| 11IP         | -283.02734639164163 |
| 12IP         | -282.96473193315290 |

  

| ACVTZ        |                     |
|--------------|---------------------|
| Ground state | -284.00731226359278 |
| 1IP          | -283.63475962654491 |
| 2IP          | -283.59822382399341 |
| 3IP          | -283.55514278055284 |
| 4IP          | -283.50294100255013 |
| 5IP          | -283.47148519368682 |
| 6IP          | -283.44843352348016 |
| 7IP          | -283.42476654486410 |
| 8IP          | -283.37882512967917 |
| 9IP          | -283.36965962464637 |
| 10IP         | -283.35283407342467 |
| 11IP         | -283.25478726653921 |
| 12IP         | -283.17611862236021 |

**Table S7** Raw values used for computing the vertical ionization potentials (IPs) for the IIn conformation of the C<sub>2</sub>H<sub>5</sub>NO<sub>2</sub> molecule determined using the frozen core EOMIP-CCSD/AVXZ (X = D and T) approach. The values are given in hartrees.

| <b>AVDZ</b>  |                     |
|--------------|---------------------|
| Ground state | -283.76277250132756 |
| 1IP          | -283.39546846035512 |
| 2IP          | -283.34687968503954 |
| 3IP          | -283.34342730187353 |
| 4IP          | -283.26879293585097 |
| 5IP          | -283.25200396717332 |
| 6IP          | -283.20897841365343 |
| 7IP          | -283.18736946546494 |
| 8IP          | -283.14828373814368 |
| 9IP          | -283.11189828671007 |
| 10IP         | -283.08496001694840 |
| 11IP         | -283.03283933943089 |
| 12IP         | -282.94211823236287 |

  

| <b>AVTZ</b>  |                     |
|--------------|---------------------|
| Ground state | -283.99605985804442 |
| 1IP          | -283.62043463794225 |
| 2IP          | -283.57263118876625 |
| 3IP          | -283.56905518212943 |
| 4IP          | -283.49540846908957 |
| 5IP          | -283.47912378317568 |
| 6IP          | -283.43666918983087 |
| 7IP          | -283.41531678355045 |
| 8IP          | -283.37635921543603 |
| 9IP          | -283.33968914094527 |
| 10IP         | -283.31359934392867 |
| 11IP         | -283.26185965497672 |
| 12IP         | -283.15528732804040 |

**Table S8** Raw values used for computing the vertical ionization potentials (IPs) for the IIn conformation of the C<sub>2</sub>H<sub>5</sub>NO<sub>2</sub> molecule determined using the EOMIP-CCSD/ACVXZ (X = D and T) approach. The values are given in hartrees.

| <b>ACVDZ</b> |                     |
|--------------|---------------------|
| Ground state | -283.96379938033778 |
| 1IP          | -283.59581066249257 |
| 2IP          | -283.54727284975115 |
| 3IP          | -283.54383913067477 |
| 4IP          | -283.46915463511203 |
| 5IP          | -283.45256024355729 |
| 6IP          | -283.40918882357352 |
| 7IP          | -283.38789695183323 |
| 8IP          | -283.34868261343712 |
| 9IP          | -283.31235175894960 |
| 10IP         | -283.28556513923184 |
| 11IP         | -283.23321107669130 |
| 12IP         | -283.13993791925952 |

  

| <b>ACVTZ</b> |                     |
|--------------|---------------------|
| Ground state | -284.26346998074905 |
| 1IP          | -283.88639509902691 |
| 2IP          | -283.83876072662406 |
| 3IP          | -283.83503993357419 |
| 4IP          | -283.76145980039672 |
| 5IP          | -283.74551429431739 |
| 6IP          | -283.70261135716191 |
| 7IP          | -283.68168748163203 |
| 8IP          | -283.64269045907884 |
| 9IP          | -283.60623343891660 |
| 10IP         | -283.58025713614177 |
| 11IP         | -283.52828988503745 |
| 12IP         | -283.41739578624441 |

**Table S9** Raw values used for computing the vertical ionization potentials (IPs) for the II<sub>n</sub> conformation of the C<sub>2</sub>H<sub>5</sub>NO<sub>2</sub> molecule determined using the frozen-core EOMIP-CCSD/ACVXZ (X = D and T) approach. The values are given in hartrees.

| <b>ACVDZ</b> |                     |
|--------------|---------------------|
| Ground state | -283.77410245735530 |
| 1IP          | -283.40637077881036 |
| 2IP          | -283.35783620487769 |
| 3IP          | -283.35440254377818 |
| 4IP          | -283.27970741088342 |
| 5IP          | -283.26309276158094 |
| 6IP          | -283.21974757842196 |
| 7IP          | -283.19845478153746 |
| 8IP          | -283.15922001530402 |
| 9IP          | -283.12284472833653 |
| 10IP         | -283.09606095476067 |
| 11IP         | -283.04369728068929 |
| 12IP         | -282.95245971663462 |

  

| <b>ACVTZ</b> |                     |
|--------------|---------------------|
| Ground state | -284.00551581738580 |
| 1IP          | -283.62947111842146 |
| 2IP          | -283.58174567022382 |
| 3IP          | -283.57808991375737 |
| 4IP          | -283.50446413083398 |
| 5IP          | -283.48834995837217 |
| 6IP          | -283.44566607198601 |
| 7IP          | -283.42455466357387 |
| 8IP          | -283.38555035243513 |
| 9IP          | -283.34889707667810 |
| 10IP         | -283.32291336085052 |
| 11IP         | -283.27098641418399 |
| 12IP         | -283.16394085848998 |

**Table S10** Raw values used for computing the vertical ionization potentials (IPs) for the II<sub>p</sub> conformation of the C<sub>2</sub>H<sub>5</sub>NO<sub>2</sub> molecule determined using the frozen core EOMIP-CCSD/AVXZ (X = D and T) approach. The values are given in hartrees.

| <b>AVDZ</b>  |                     |
|--------------|---------------------|
| Ground state | -283.76259179411295 |
| 1IP          | -283.39767271885535 |
| 2IP          | -283.34485972259358 |
| 3IP          | -283.34360637637485 |
| 4IP          | -283.26930521693737 |
| 5IP          | -283.25414535376871 |
| 6IP          | -283.20923341286914 |
| 7IP          | -283.18777303955318 |
| 8IP          | -283.14769571176390 |
| 9IP          | -283.10595154391797 |
| 10IP         | -283.08762231456154 |
| 11IP         | -283.03369309197791 |
| 12IP         | -282.94235098837783 |

  

| <b>AVTZ</b>  |                     |
|--------------|---------------------|
| Ground state | -283.99598980901681 |
| 1IP          | -283.62274502024411 |
| 2IP          | -283.57061328137445 |
| 3IP          | -283.56943101935047 |
| 4IP          | -283.49602386963841 |
| 5IP          | -283.48135892677868 |
| 6IP          | -283.43702072051053 |
| 7IP          | -283.41582293659252 |
| 8IP          | -283.37588704398178 |
| 9IP          | -283.33373336540257 |
| 10IP         | -283.31647622212739 |
| 11IP         | -283.26279256768879 |
| 12IP         | -283.15563788111643 |

**Table S11** Raw values used for computing the vertical ionization potentials (IPs) for the IIp conformation of the C<sub>2</sub>H<sub>5</sub>NO<sub>2</sub> molecule determined using the EOMIP-CCSD/ACVXZ (X = D and T) approach. The values are given in hartrees.

| ACVDZ        |                     |
|--------------|---------------------|
| Ground state | -283.96365442304239 |
| 1IP          | -283.59804954240190 |
| 2IP          | -283.54530853848081 |
| 3IP          | -283.54402754948114 |
| 4IP          | -283.46970230749173 |
| 5IP          | -283.45474526533206 |
| 6IP          | -283.40946923966595 |
| 7IP          | -283.38834296786638 |
| 8IP          | -283.34813564722316 |
| 9IP          | -283.30639976582034 |
| 10IP         | -283.28830238930567 |
| 11IP         | -283.23410103831435 |
| 12IP         | -283.14018418302589 |
| ACVTZ        |                     |
| Ground state | -284.26344691263733 |
| 1IP          | -283.88874984278442 |
| 2IP          | -283.83664035360022 |
| 3IP          | -283.83559439587549 |
| 4IP          | -283.76211985319111 |
| 5IP          | -283.74781286721174 |
| 6IP          | -283.70299971837233 |
| 7IP          | -283.68224191790529 |
| 8IP          | -283.64226704456598 |
| 9IP          | -283.60028146646624 |
| 10IP         | -283.58322326350054 |
| 11IP         | -283.52926485365788 |
| 12IP         | -283.41774557441659 |

**Table S12** Raw values used for computing the vertical ionization potentials (IPs) for the IIp conformation of the C<sub>2</sub>H<sub>5</sub>NO<sub>2</sub> molecule determined using the frozen-core EOMIP-CCSD/ACVXZ (X = D and T) approach. The values are given in hartrees.

| ACVDZ        |                     |
|--------------|---------------------|
| Ground state | -283.77393055198615 |
| 1IP          | -283.40858360543228 |
| 2IP          | -283.35584427120938 |
| 3IP          | -283.35456961166875 |
| 4IP          | -283.28022809590368 |
| 5IP          | -283.26524680625357 |
| 6IP          | -283.22000001481609 |
| 7IP          | -283.19887658743932 |
| 8IP          | -283.15864671541607 |
| 9IP          | -283.11687003835465 |
| 10IP         | -283.09876742499830 |
| 11IP         | -283.04456117192711 |
| 12IP         | -282.95269886167102 |
| ACVTZ        |                     |
| Ground state | -284.00545755411912 |
| 1IP          | -283.63179299950156 |
| 2IP          | -283.57965674751159 |
| 3IP          | -283.57855631581191 |
| 4IP          | -283.50508920356992 |
| 5IP          | -283.49060111681905 |
| 6IP          | -283.44602021015606 |
| 7IP          | -283.42507724716279 |
| 8IP          | -283.38509280171502 |
| 9IP          | -283.34292138672845 |
| 10IP         | -283.32583287595412 |
| 11IP         | -283.27192960098370 |
| 12IP         | -283.16429889307886 |

**Table S13** Raw values used for computing the vertical ionization potentials (IPs) for the III<sub>n</sub> conformation of the C<sub>2</sub>H<sub>5</sub>NO<sub>2</sub> molecule determined using the frozen core EOMIP-CCSD/AVXZ (X = D and T) approach. The values are given in hartrees.

| AVDZ         |                     |
|--------------|---------------------|
| Ground state | -283.76186972103420 |
| 1IP          | -283.40791410788711 |
| 2IP          | -283.34211471056739 |
| 3IP          | -283.31998733863173 |
| 4IP          | -283.25839882017567 |
| 5IP          | -283.23314452613249 |
| 6IP          | -283.22136513101100 |
| 7IP          | -283.18057207830100 |
| 8IP          | -283.13943701894175 |
| 9IP          | -283.13734881030041 |
| 10IP         | -283.10960044602382 |
| 11IP         | -283.00005945981059 |
| 12IP         | -282.97406120789583 |

  

| AVTZ         |                     |
|--------------|---------------------|
| Ground state | -283.99494753436761 |
| 1IP          | -283.63284952327541 |
| 2IP          | -283.56721750094272 |
| 3IP          | -283.54558113145202 |
| 4IP          | -283.48569737635404 |
| 5IP          | -283.46013732676136 |
| 6IP          | -283.44877111108485 |
| 7IP          | -283.40804270896831 |
| 8IP          | -283.36707023178417 |
| 9IP          | -283.36495017677117 |
| 10IP         | -283.33814257501263 |
| 11IP         | -283.22910723830472 |
| 12IP         | -283.18668271445227 |

**Table S14** Raw values used for computing the vertical ionization potentials (IPs) for the III<sub>n</sub> conformation of the C<sub>2</sub>H<sub>5</sub>NO<sub>2</sub> molecule determined using the EOMIP-CCSD/ACVXZ (X = D and T) approach. The values are given in hartrees.

| ACVDZ        |                     |
|--------------|---------------------|
| Ground state | -283.96282425158660 |
| 1IP          | -283.60821064140396 |
| 2IP          | -283.54240212212460 |
| 3IP          | -283.52035394412974 |
| 4IP          | -283.45896016879749 |
| 5IP          | -283.43346499711163 |
| 6IP          | -283.42176355390211 |
| 7IP          | -283.38100222188592 |
| 8IP          | -283.33956340176638 |
| 9IP          | -283.33766962230288 |
| 10IP         | -283.31011538422723 |
| 11IP         | -283.20046677791777 |
| 12IP         | -283.17179313153576 |

  

| ACVTZ        |                     |
|--------------|---------------------|
| Ground state | -284.26234642450873 |
| 1IP          | -283.89888760112962 |
| 2IP          | -283.83323464616331 |
| 3IP          | -283.81152990907196 |
| 4IP          | -283.75226020899083 |
| 5IP          | -283.72626422270190 |
| 6IP          | -283.71503911139172 |
| 7IP          | -283.67428864425676 |
| 8IP          | -283.63330204171410 |
| 9IP          | -283.63108607869538 |
| 10IP         | -283.60481705457261 |
| 11IP         | -283.49569088652817 |
| 12IP         | -283.44874943731458 |



**Table S15** Raw values used for computing the vertical ionization potentials (IPs) for the III<sub>n</sub> conformation of the C<sub>2</sub>H<sub>5</sub>NO<sub>2</sub> molecule determined using the frozen-core EOMIP-CCSD/ACVXZ (X = D and T) approach. The values are given in hartrees.

| <b>ACVDZ</b> |                     |
|--------------|---------------------|
| Ground state | -283.77317114660298 |
| 1IP          | -283.41881332563992 |
| 2IP          | -283.35300424674875 |
| 3IP          | -283.33096964850336 |
| 4IP          | -283.26948776087767 |
| 5IP          | -283.24405012766277 |
| 6IP          | -283.23234348742591 |
| 7IP          | -283.19162431909666 |
| 8IP          | -283.15008970069334 |
| 9IP          | -283.14830806772346 |
| 10IP         | -283.12064197256910 |
| 11IP         | -283.01096951549425 |
| 12IP         | -282.98437186682605 |

  

| <b>ACVTZ</b> |                     |
|--------------|---------------------|
| Ground state | -284.00442241519880 |
| 1IP          | -283.64194390310809 |
| 2IP          | -283.57628586975829 |
| 3IP          | -283.55465335398196 |
| 4IP          | -283.49498962244957 |
| 5IP          | -283.46925811539182 |
| 6IP          | -283.45798688129884 |
| 7IP          | -283.41726589650301 |
| 8IP          | -283.37609047144775 |
| 9IP          | -283.37412521807778 |
| 10IP         | -283.34745966242588 |
| 11IP         | -283.23834552242300 |
| 12IP         | -283.19534008469464 |

**Table S16** Raw values used for computing the vertical ionization potentials (IPs) for the III<sub>p</sub> conformation of the C<sub>2</sub>H<sub>5</sub>NO<sub>2</sub> molecule determined using the frozen core EOMIP-CCSD/AVXZ (X = D and T) approach. The values are given in hartrees.

| <b>AVDZ</b>  |                     |
|--------------|---------------------|
| Ground state | -283.76183756483130 |
| 1IP          | -283.40810074607566 |
| 2IP          | -283.34139975440513 |
| 3IP          | -283.32286597602007 |
| 4IP          | -283.25783848001089 |
| 5IP          | -283.23478050019048 |
| 6IP          | -283.21830581507743 |
| 7IP          | -283.18579918634379 |
| 8IP          | -283.13764701226017 |
| 9IP          | -283.13635082496012 |
| 10IP         | -283.11010292991148 |
| 11IP         | -282.99902076967516 |
| 12IP         | -282.96604476153243 |

  

| <b>AVTZ</b>  |                     |
|--------------|---------------------|
| Ground state | -283.99497882595477 |
| 1IP          | -283.63309844842541 |
| 2IP          | -283.56661022860635 |
| 3IP          | -283.54858665099056 |
| 4IP          | -283.48503372819334 |
| 5IP          | -283.46177994958015 |
| 6IP          | -283.44597697498722 |
| 7IP          | -283.41323739308029 |
| 8IP          | -283.36522486713704 |
| 9IP          | -283.36410278899655 |
| 10IP         | -283.33878263388823 |
| 11IP         | -283.22818780491258 |
| 12IP         | -283.17874541816172 |

**Table S17** Raw values used for computing the vertical ionization potentials (IPs) for the IIIp conformation of the  $C_2H_5NO_2$  molecule determined using the EOMIP-CCSD/ACVXZ (X = D and T) approach. The values are given in hartrees.

| ACVDZ        |                     |
|--------------|---------------------|
| Ground state | -283.96280050958535 |
| 1IP          | -283.60840525439988 |
| 2IP          | -283.54169620484919 |
| 3IP          | -283.52324166228772 |
| 4IP          | -283.45841322971575 |
| 5IP          | -283.43509016407626 |
| 6IP          | -283.41872533820759 |
| 7IP          | -283.38624603402991 |
| 8IP          | -283.33774636029983 |
| 9IP          | -283.33667765650847 |
| 10IP         | -283.31066929749852 |
| 11IP         | -283.19944070720550 |
| 12IP         | -283.15719465934654 |

  

| ACVTZ        |                     |
|--------------|---------------------|
| Ground state | -284.26239179315564 |
| 1IP          | -283.89914946533634 |
| 2IP          | -283.83265542251530 |
| 3IP          | -283.81456558752706 |
| 4IP          | -283.75160213422799 |
| 5IP          | -283.72786217106386 |
| 6IP          | -283.71231071564262 |
| 7IP          | -283.67948669824489 |
| 8IP          | -283.63143199713494 |
| 9IP          | -283.63026955017659 |
| 10IP         | -283.60549237877899 |
| 11IP         | -283.49477817087831 |
| 12IP         | -283.44082484594082 |

**Table S18** Raw values used for computing the vertical ionization potentials (IPs) for the IIIp conformation of the  $C_2H_5NO_2$  molecule determined using the frozen-core EOMIP-CCSD/ACVXZ (X = D and T) approach. The values are given in hartrees.

| ACVDZ        |                     |
|--------------|---------------------|
| Ground state | -283.77313584942908 |
| 1IP          | -283.41899700229203 |
| 2IP          | -283.35228356197797 |
| 3IP          | -283.33384451795303 |
| 4IP          | -283.26893076997101 |
| 5IP          | -283.24567003235745 |
| 6IP          | -283.22928547897459 |
| 7IP          | -283.19686094799818 |
| 8IP          | -283.14825382309732 |
| 9IP          | -283.14730362819756 |
| 10IP         | -283.12119227440093 |
| 11IP         | -283.00993396013274 |
| 12IP         | -282.97634859171325 |

  

| ACVTZ        |                     |
|--------------|---------------------|
| Ground state | -284.00446249974539 |
| 1IP          | -283.64220248949135 |
| 2IP          | -283.57568973637103 |
| 3IP          | -283.55767549187453 |
| 4IP          | -283.49432827014294 |
| 5IP          | -283.47088496819953 |
| 6IP          | -283.45522376138877 |
| 7IP          | -283.42246818201988 |
| 8IP          | -283.37419157882357 |
| 9IP          | -283.37331324467738 |
| 10IP         | -283.34814157640398 |
| 11IP         | -283.23743363618826 |
| 12IP         | -283.18741371972186 |

**Table S19** Raw values used for computing the vertical ionization potentials (IPs) for the IVn conformation of the C<sub>2</sub>H<sub>5</sub>NO<sub>2</sub> molecule determined using the frozen core EOMIP-CCSD/AVXZ (X = D and T) approach. The values are given in hartrees.

| AVDZ         |                     |
|--------------|---------------------|
| Ground state | -283.76247447740150 |
| 1IP          | -283.40304582159621 |
| 2IP          | -283.36567295599644 |
| 3IP          | -283.31987441792228 |
| 4IP          | -283.25109782246454 |
| 5IP          | -283.23526077469182 |
| 6IP          | -283.21281001059759 |
| 7IP          | -283.19009798098637 |
| 8IP          | -283.14473338853065 |
| 9IP          | -283.13632361574469 |
| 10IP         | -283.10298676064980 |
| 11IP         | -283.01762915921734 |
| 12IP         | -282.95784880168048 |

  

| AVTZ         |                     |
|--------------|---------------------|
| Ground state | -283.99572117282821 |
| 1IP          | -283.62874144666915 |
| 2IP          | -283.59081312495425 |
| 3IP          | -283.54563345464510 |
| 4IP          | -283.47844164816479 |
| 5IP          | -283.46244624243928 |
| 6IP          | -283.44030343778240 |
| 7IP          | -283.41793967323491 |
| 8IP          | -283.37280400799017 |
| 9IP          | -283.36419347909936 |
| 10IP         | -283.33151589906333 |
| 11IP         | -283.24673303178844 |
| 12IP         | -283.17204037219562 |

**Table S20** Raw values used for computing the vertical ionization potentials (IPs) for the IVn conformation of the C<sub>2</sub>H<sub>5</sub>NO<sub>2</sub> molecule determined using the EOMIP-CCSD/ACVXZ (X = D and T) approach. The values are given in hartrees.

| ACVDZ        |                     |
|--------------|---------------------|
| Ground state | -283.96347065300949 |
| 1IP          | -283.60343856519683 |
| 2IP          | -283.56601662814143 |
| 3IP          | -283.52027833574653 |
| 4IP          | -283.45149907311742 |
| 5IP          | -283.43575139807695 |
| 6IP          | -283.41326852532973 |
| 7IP          | -283.39049603064149 |
| 8IP          | -283.34523181157181 |
| 9IP          | -283.33648880419702 |
| 10IP         | -283.30346666747090 |
| 11IP         | -283.21805891499440 |
| 12IP         | -283.15594012678071 |

  

| ACVTZ        |                     |
|--------------|---------------------|
| Ground state | -284.26316993288350 |
| 1IP          | -283.89508401735822 |
| 2IP          | -283.85676854962338 |
| 3IP          | -283.81163289769262 |
| 4IP          | -283.74461429258298 |
| 5IP          | -283.72887517216236 |
| 6IP          | -283.70664420812318 |
| 7IP          | -283.68423925016992 |
| 8IP          | -283.63930633031936 |
| 9IP          | -283.63044793731626 |
| 10IP         | -283.59810056677605 |
| 11IP         | -283.51338032222361 |
| 12IP         | -283.43469853830055 |

**Table S21** Raw values used for computing the vertical ionization potentials (IPs) for the IVn conformation of the C<sub>2</sub>H<sub>5</sub>NO<sub>2</sub> molecule determined using the frozen-core EOMIP-CCSD/ACVXZ (X = D and T) approach. The values are given in hartrees.

| ACVDZ        |                     |
|--------------|---------------------|
| Ground state | -283.77379758151915 |
| 1IP          | -283.41398007091777 |
| 2IP          | -283.37661220230183 |
| 3IP          | -283.33086948225241 |
| 4IP          | -283.26206599345670 |
| 5IP          | -283.24630635997238 |
| 6IP          | -283.22383931612075 |
| 7IP          | -283.20104742722827 |
| 8IP          | -283.15580914713991 |
| 9IP          | -283.14699235306477 |
| 10IP         | -283.11400257982280 |
| 11IP         | -283.02851697059145 |
| 12IP         | -282.96826438447971 |
| ACVTZ        |                     |
| Ground state | -284.00521791877918 |
| 1IP          | -283.63791509036128 |
| 2IP          | -283.59989140988415 |
| 3IP          | -283.55471421579779 |
| 4IP          | -283.48760981773347 |
| 5IP          | -283.47171016516404 |
| 6IP          | -283.44955304977680 |
| 7IP          | -283.42712692400613 |
| 8IP          | -283.38211605373635 |
| 9IP          | -283.37319528733298 |
| 10IP         | -283.34082083573975 |
| 11IP         | -283.25597479260068 |
| 12IP         | -283.18078495669778 |

**Table S22** Cartesian coordinates of the neutral Ip conformation of glycine as optimized at the CCSD(T)/aug-cc-pVTZ level of theory in the gas-phase. Values are given in Å

| Atom | X             | Y             | Z             |
|------|---------------|---------------|---------------|
| C    | 0.4977693494  | -0.0854849807 | 0.0000000000  |
| C    | -0.7706473044 | 0.7516340973  | 0.0000000000  |
| N    | -2.0106622419 | -0.0038659951 | 0.0000000000  |
| O    | 1.6031519118  | 0.6990120572  | 0.0000000000  |
| O    | 0.5454055687  | -1.2931850324 | 0.0000000000  |
| H    | 2.3639032771  | 0.0988622189  | 0.0000000000  |
| H    | -0.7318780623 | 1.4072283373  | -0.8741914261 |
| H    | -0.7318780623 | 1.4072283373  | 0.8741914261  |
| H    | -2.0300182181 | -0.6197150199 | 0.8067621318  |
| H    | -2.0300182181 | -0.6197150199 | -0.8067621318 |

**Table S23** Cartesian coordinates of the cation Ip conformation of glycine as optimized at the CCSD(T)/aug-cc-pVTZ level of theory in the gas-phase. Values are given in Å

| Atom | X             | Y             | Z             |
|------|---------------|---------------|---------------|
| C    | 0.6102776369  | -0.1580837630 | 0.0000000000  |
| C    | -0.7535109536 | 0.7137481407  | 0.0000000000  |
| N    | -1.8798272638 | -0.1170840362 | 0.0000000000  |
| O    | 1.5890606574  | 0.7327336687  | 0.0000000000  |
| O    | 0.6387404218  | -1.3471136754 | 0.0000000000  |
| H    | 2.4444231910  | 0.2662503015  | 0.0000000000  |
| H    | -0.7089800959 | 1.3154530509  | -0.9093098452 |
| H    | -0.7089800959 | 1.3154530509  | 0.9093098452  |
| H    | -2.2630377490 | -0.4896788691 | 0.8673937820  |
| H    | -2.2630377490 | -0.4896788691 | -0.8673937820 |

**Table S24** Cartesian coordinates of the neutral IIn conformation of glycine as optimized at the MP2/6-311++G\* level of theory in the gas-phase. Values are given in Å

| Atom | X             | Y             | Z             |
|------|---------------|---------------|---------------|
| C    | 0.0059004863  | -0.0448955524 | -0.6074176658 |
| C    | 0.1002871437  | -0.8244187993 | 0.7103018081  |
| N    | -0.0723681513 | 0.0682451461  | 1.8618139662  |
| O    | 0.0403479605  | 1.2875760988  | -0.4514712568 |
| O    | -0.0637149456 | -0.5909995281 | -1.6818081694 |
| H    | 0.0762059911  | 1.4126000962  | 0.5206135683  |
| H    | -0.6233440060 | -1.6427094097 | 0.6622517480  |
| H    | 1.0980620138  | -1.2713982783 | 0.7298791393  |
| H    | -1.0114058093 | 0.0114453042  | 2.2406782803  |
| H    | 0.5716760294  | -0.1562279627 | 2.6104518385  |
